# Supplementary material
Source: PubMed Central journal article supplement (PMC10833737)
Supplement: media-2.pdf [file media-2.pdf]

| REAGENT or RESOURCE                                                  | SOURCE         | IDENTIFIER                     |
|----------------------------------------------------------------------|----------------|--------------------------------|
| <b><i>In vivo</i> Antibodies</b>                                     |                |                                |
| Anti-CTLA-4 (clone 9D9)                                              | Leinco         | Cat# C2856, RRID: AB_2829611   |
| Anti-CD279 (PD-1) (clone RMP1-14)                                    | Leinco         | Cat# RMP1-14, RRID: AB_2749820 |
| Anti-mouse CD8 (clone YTS 169)                                       | Leinco         | Cat# C2442, RRID: AB_2829540   |
| Anti-mouse CD4 (Clone GK1.5)                                         | Leinco         | Cat# C2838, RRID: AB_2829596   |
| Mouse IgG2a Isotype                                                  | Leinco         | Cat# P381, RRID: AB_2831654    |
| <b>Flow Antibodies and reagents</b>                                  |                |                                |
| Anti-CD16/32 (clone 2.4G2)                                           | BD Biosciences | Cat#553141, RRID: AB_394656    |
| Anti-mouse CD45 BV605 (clone 30-F11)<br>(1:800 dilution)             | BioLegend      | Cat#103140, RRID: AB_2562342   |
| Anti-mouse CD90.2/Thy1.2-PE-Cy7 (clone 30-H12)<br>(1:200 dilution)   | BioLegend      | Cat#105326, RRID: AB_2201290   |
| Anti-mouse CD8a-BV786 (clone 53–6.7)<br>(1:200 dilution)             | BD Bioscience  | Cat#563332, RRID: AB_2721167   |
| Anti-mouse CD4-BV711(clone RM4–5)<br>(1:200 dilution)                | BioLegend      | Cat#100550, RRID: AB_2562099   |
| Anti-mouse CD19-BV650 (clone 1D3)<br>(1:200 dilution)                | BD Bioscience  | Cat#563235, RRID: AB_2738085   |
| Anti-mouse CD20-BV421 (clone SA275A11)<br>(1:200 dilution)           | BioLegend      | Cat#150405, RRID: AB_2566540   |
| Anti-mouse CD45R/B220-BUV395 (clone RA3-6B2)<br>(1:200 dilution)     | BD Bioscience  | Cat# 563793, RRID: AB_2738427  |
| Anti-mouse Nkp46/CD335-FITC (clone 29A1.4)<br>(1:300 dilution)       | BioLegend      | Cat# 560756, RRID: AB_1727465  |
| Anti-mouse $\gamma\delta$ TCR-PE-Cy7 (clone GL3)<br>(1:300 dilution) | BioLegend      | Cat# 118124, RRID: AB_11204423 |
| Anti-mouse PD-1-BV421 (clone 29F.1A12)<br>(1:200 dilution)           | BioLegend      | Cat# 135218, RRID: AB_2561447  |
| Anti-mouse TIM-3 (clone RMT3-23)<br>(1:200 dilution)                 | BioLegend      | Cat# 119727, RRID: AB_2716208  |
| Anti-mouse LAG-3-PerCP-Cy5.5 (clone C9B7W)<br>(1:200 dilution)       | BioLegend      | Cat# 125212, RRID: AB_2561517  |
| Anti-mouse CD3e-APC (clone 145–2C11)<br>(1:200 dilution)             | BioLegend      | Cat# 100312, RRID: AB_312677   |
| Anti-mouse CD64-BV421 (clone X54–5/7.1)<br>(1:200 dilution)          | BioLegend      | Cat# 139309, RRID: AB_2562694  |
| Anti-mouse Ly6G-Alexa Fluor 700 (clone 1A8)<br>(1:400 dilution)      | BD Biosciences | Cat# 127622, RRID: AB_10643269 |
| Anti-mouse CX3CR1-FITC (clone SA011F11)<br>(1:1,000 dilution)        | BioLegend      | Cat# 149020, RRID: AB_2565703  |

|                                                                    |                |                                    |
|--------------------------------------------------------------------|----------------|------------------------------------|
| Anti-mouse I-A/I-E-BV650 (clone M5/114.15.2)<br>(1:3,000 dilution) | BD Bioscience  | Cat# 563415, RRID: AB_2738192      |
| Anti-mouse CD103-BV421 (clone 2E7)<br>(1:200 dilution)             | BioLegend      | Cat# 121422, RRID: AB_2562901      |
| Anti-mouse CD24-BV711 (clone M1/69)<br>(1:500 dilution)            | BD Bioscience  | Cat# 563450, RRID: AB_2738213      |
| Anti-mouse CD11c-BV786 (clone HL3)<br>(1:400 dilution)             | BD Biosciences | Cat# 563735, RRID: AB_2738394      |
| Anti-mouse CD11b-APC (clone M1/70)<br>(1:400 dilution)             | BioLegend      | Cat# 101212, RRID: AB_312795       |
| Anti-mouse F4/80-BUV395 (clone T45-2342)<br>(1:400 dilution)       | BD Biosciences | Cat# 565614, RRID: AB_2739304      |
| Anti-mouse CD64-APC (clone X54-5/7.1)<br>(1:400 dilution)          | BioLegend      | Cat# 139306, RRID: AB_11219391     |
| Anti-mouse CD117-FITC (clone ACK2)<br>(1:100 dilution)             | BioLegend      | Cat# 135115, RRID: AB_2561633      |
| Anti-mouse CD11b- PerCP-Cy5.5 (clone M1/70)<br>(1:200 dilution)    | BioLegend      | Cat# 561114, RRID: AB_394002       |
| Anti-mouse PDCA- 1/BST-2 BV650 (clone 927)<br>(1:200 dilution)     | BD Biosciences | Cat# 747605, RRID: AB_2744173      |
| Anti-mouse CD172a APC (clone P84)<br>(1:200 dilution)              | BioLegend      | Cat# 144014, RRID: AB_2564061      |
| Anti-mouse CD274/PDL1-PE (clone MIH5)<br>(1:200 dilution)          | BD Biosciences | Cat# 558091, RRID: AB_397018       |
| Anti-mouse FcεRI-PE-Cy7 (clone MAR-1)<br>(1:200 dilution)          | BioLegend      | Cat# 134326, RRID: AB_2572064      |
| Anti-mouse Mrc1 (CD206)-PE-Cy7 (clone C068C2)<br>(1:400 dilution)  | BioLegend      | Cat# 141720, RRID: AB_2562248      |
| Anti-mouse FOXP3-FITC (clone FJK-16s)                              | eBioscience™   | Cat# 11-5773-82, RRID: AB_465243   |
| Anti-mouse IFNγ-APC (Clone XMG1.2)<br>(1:200 dilution)             | BD Biosciences | Cat# 554413, RRID: AB_398551       |
| Anti-mouse TNF -PE-Cy7 (Clone MP6-XT22)<br>(1:200 dilution)        | BD Biosciences | Cat# 561062, RRID: AB_398553       |
| Anti-mouse Granzyme B-PE (Clone NGZB)<br>(1:200 dilution)          | eBioscience™   | Cat# 12-8898-82, RRID: AB_10870787 |
| Anti-mouse iNOS/Nos2 PE (clone CXNFT)<br>(1:200 dilution)          | eBioscience™   | Cat# 12-5920-82, RRID: AB_2572642  |
| Zombie Fixable Viability™ Sampler Kit                              | BioLegend      | Cat# 423105                        |
| <b>Chemicals, Peptides, and Gene blocks</b>                        |                |                                    |
| RPMI-1640                                                          | HyClone        | Cat# SH30096.02                    |
| Trypsin                                                            | Genclone       | Cat# 25200056                      |

|                                                          |                |                   |
|----------------------------------------------------------|----------------|-------------------|
| Defined fetal bovine serum                               | HyClone        | Cat# SH30070.03HI |
| HBSS                                                     | Hyclone        | Cat# SH30588.02   |
| PBS                                                      | Gibco          | Cat# 20012027     |
| Sodium Bicarbonate                                       | Gibco          | Cat# 25080094     |
| Sodium Pyruvate                                          | Gibco          | Cat# 11360070     |
| L-Glutamine                                              | Gibco          | Cat# A2916801     |
| ACK lysis buffer                                         | Gibco          | Cat# A1049201     |
| Phorbol-12-myristate-13-acetate (PMA)                    | MilliporeSigma | Cat# 500582       |
| Ionomycin                                                | Fisher         | Cat# BP2527-1     |
| Fugene                                                   | Promega        | Cat# E2311        |
| pMSCV-IRES GFP                                           | addgene        | Cat# 20672        |
| Collagenase Type IA                                      | Sigma-Aldrich  | Cat# C9891        |
| Poly(I:C) HMW VacciGrade™                                | InvivoGen      | Cat# vac-pic      |
| Gibson Assembly® Cloning Kit                             | NEB            | Cat# E5510S       |
| Mutant Lama4 peptide, sequence VGFNFRTL                  | Peptide 2.0    | Custom order      |
| Mutant Alg8 peptide, sequence ITYTWTRL                   | Peptide 2.0    | Custom order      |
| Mutant Lama4 SLP, sequence QKISFFDGFVGFNFRTLQPNGLLFYYT   | Peptide 2.0    | Custom order      |
| Mutant Adpgk SLP, sequence HLELASMTNMELMSSIVHQ           | Peptide 2.0    | Custom order      |
| Mutant Rpl18 SLP, sequence KAGGKILTFDRLALESPK            | Peptide 2.0    | Custom order      |
| Mutant Dpagt1 SLP, sequence EAGQSLVISASIIVFNLELEGDYR     | Peptide 2.0    | Custom order      |
| OVA-I <sub>257-264</sub> peptide, sequence SIINFEKL      | Peptide 2.0    | Custom order      |
| Mutant Itgb1 SLP, sequence DDCWFYFTYSVNGYMEAIHVHVVETPDCP | Peptide 2.0    | Custom order      |
| OVA-II <sub>323-339</sub> , sequence ISQAVHAAHAEINEAGR   | Peptide 2.0    | Custom order      |
| mAlg8-P2A-mItgb1                                         | IDT            | Custom order      |

|                                                                                                                                                                                                                                                                                                                                             |                                                                                                                                                         |                               |
|---------------------------------------------------------------------------------------------------------------------------------------------------------------------------------------------------------------------------------------------------------------------------------------------------------------------------------------------|---------------------------------------------------------------------------------------------------------------------------------------------------------|-------------------------------|
| CTTCTCTAGGCGCCGGAATTCAGCCACCATGGCAGTG<br>GGCATCACATACACTGGACCAGGCTGTATGCTTCAGT<br>GTTGACTGGCTCCCTTGTGCGGCAGCGGCCACAAAC<br>TTCTCTGCTAAAGCAAGCAGGTGATGTTGAAGAAAA<br>CCCCGGCCTGATGACTGCTGGTTCTATTTACCTATTC<br>AGTGAATGGCTACAATGAAGCTATCGTGCATGTTGTGG<br>AGACTCCAGACTGTCCTAATACGTAGCTAGCGGATCCCA                                                |                                                                                                                                                         |                               |
| mLama4-P2A-mltgb1<br>CTTCTCTAGGCGCCGGAATTCAGCCACCATGCAGAAAATA<br>TCTTTCTTTGATGGCTTTGAAGTAGGCTTCAATTTCCGAAC<br>ATTACAGCCAAATGGGTTACTATTCTACTACACAGGCAGCG<br>GCGCCACAACTTCTCTGCTAAAGCAAGCAGGTGATGT<br>TGAAGAAAACCCGGCCTGATGACTGCTGGTTCTATTTCA<br>CCTATTCAGTGAATGGCTACAATGAAGCTATCGTGCATGTTG<br>TGGAGACTCCAGACTGTCCTAATACGTAGCTAGCGGATCCC<br>A | IDT                                                                                                                                                     | Custom order                  |
| <b>Critical Commercial Assays</b>                                                                                                                                                                                                                                                                                                           |                                                                                                                                                         |                               |
| Fixation/Permeabilization Solution Kit                                                                                                                                                                                                                                                                                                      | BD Biosciences                                                                                                                                          | Cat# 555028                   |
| Foxp3 / Transcription Factor Staining Buffer Set                                                                                                                                                                                                                                                                                            | eBioscience                                                                                                                                             | Cat# 00-5523-00               |
| Chromium Next GEM Single-cell 5' Reagent Kit v2                                                                                                                                                                                                                                                                                             | 10x Genomics                                                                                                                                            | Cat# 100263                   |
| Chromium Next GEM Single Cell 5' v2 (Dual Index)                                                                                                                                                                                                                                                                                            | 10x Genomics                                                                                                                                            | Cat# CG000330                 |
| Qubit HS dsDNA Assay                                                                                                                                                                                                                                                                                                                        | ThermoFisher                                                                                                                                            | Cat# Q32851                   |
| HS DNA Bioanalyzer                                                                                                                                                                                                                                                                                                                          | Agilent                                                                                                                                                 |                               |
| <b>TotalSeq Antibodies</b>                                                                                                                                                                                                                                                                                                                  |                                                                                                                                                         |                               |
| CD45 and H-2 MHC class Totalseq™-C0301<br>anti-mouse Hashtag 1, sequence                                                                                                                                                                                                                                                                    | BioLegend                                                                                                                                               | Cat# 155861, RRID: AB_2800693 |
| CD45 and H-2 MHC class Totalseq™-C0302<br>anti-mouse Hashtag 2 Antibody                                                                                                                                                                                                                                                                     | BioLegend                                                                                                                                               | Cat# 155863, RRID: AB_2800694 |
| CD45 and H-2 MHC class Totalseq™-C0303<br>anti-mouse Hashtag 3 Antibody                                                                                                                                                                                                                                                                     | BioLegend                                                                                                                                               | Cat# 155865, RRID: AB_2800695 |
| <b>Software and algorithms</b>                                                                                                                                                                                                                                                                                                              |                                                                                                                                                         |                               |
| Flow jo_v10.8.1                                                                                                                                                                                                                                                                                                                             |                                                                                                                                                         |                               |
| GraphPad Prism version 10                                                                                                                                                                                                                                                                                                                   |                                                                                                                                                         |                               |
| Cell Ranger v.7.1.0                                                                                                                                                                                                                                                                                                                         | <a href="https://support.10xgenomics.com/single-cell-gene-expression/software">https://support.10xgenomics.com/single-cell-gene-expression/software</a> |                               |

|                            |                                                                                                         |  |
|----------------------------|---------------------------------------------------------------------------------------------------------|--|
| Seurat R package v.4.3.0.1 | <a href="https://satijalab.org/seurat/">https://satijalab.org/seurat/</a>                               |  |
| scRepertoire v.2.0.0       | <a href="https://www.bor.ch.dev/uploads/screpertoire/">https://www.bor.ch.dev/uploads/screpertoire/</a> |  |
| ImmGen                     | <a href="https://www.immgen.org">https://www.immgen.org</a>                                             |  |
| ggplot2                    | <a href="https://ggplot2.tidyverse.org/index.html">https://ggplot2.tidyverse.org/index.html</a>         |  |
| <b>Other</b>               |                                                                                                         |  |
| Fortessa X-20              | BD Biosciences                                                                                          |  |
| LSR Fortessa               | BD Biosciences                                                                                          |  |
| BD FACSAria II             | BD Biosciences                                                                                          |  |
